# Supplementary material for: Surgical Management and Long-term Outcomes of Sacrococcygeal Teratoma in Neonates: A 30-Patient Cohort Study
Source: Research Square preprint supplement (doi:10.21203/rs.3.rs-8287082/v1), 2025-12-08
Supplement: Supplementary file 1 [file 2894bb0a38b7ed4b84406821.docx]

1. **Pre-operative pictures of few patients with sacrococcygeal teratoma (SCT)**


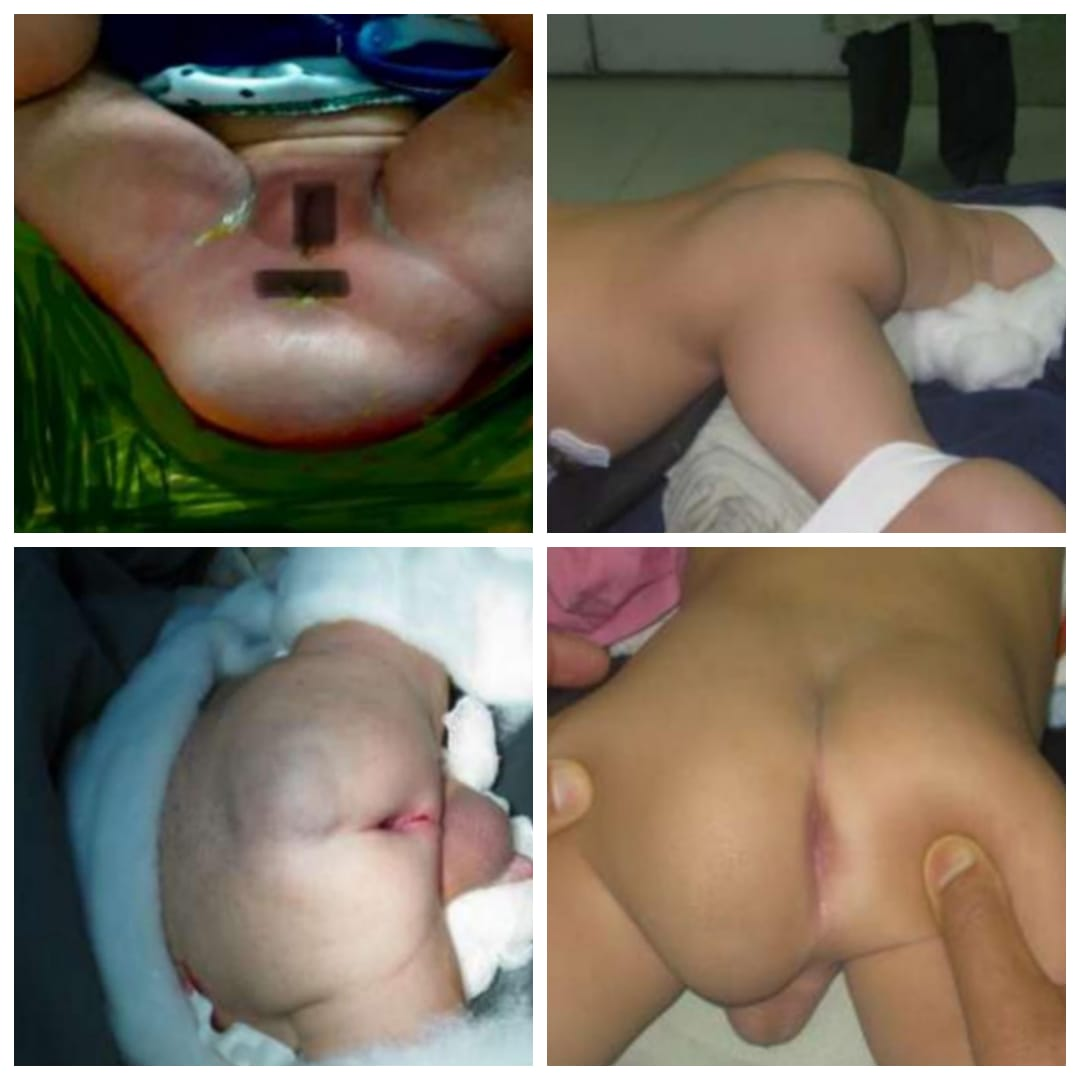


1. **MRI scan and post-operative pictures of a neonate with Type-4 sacrococcygeal teratoma (SCT)**

**
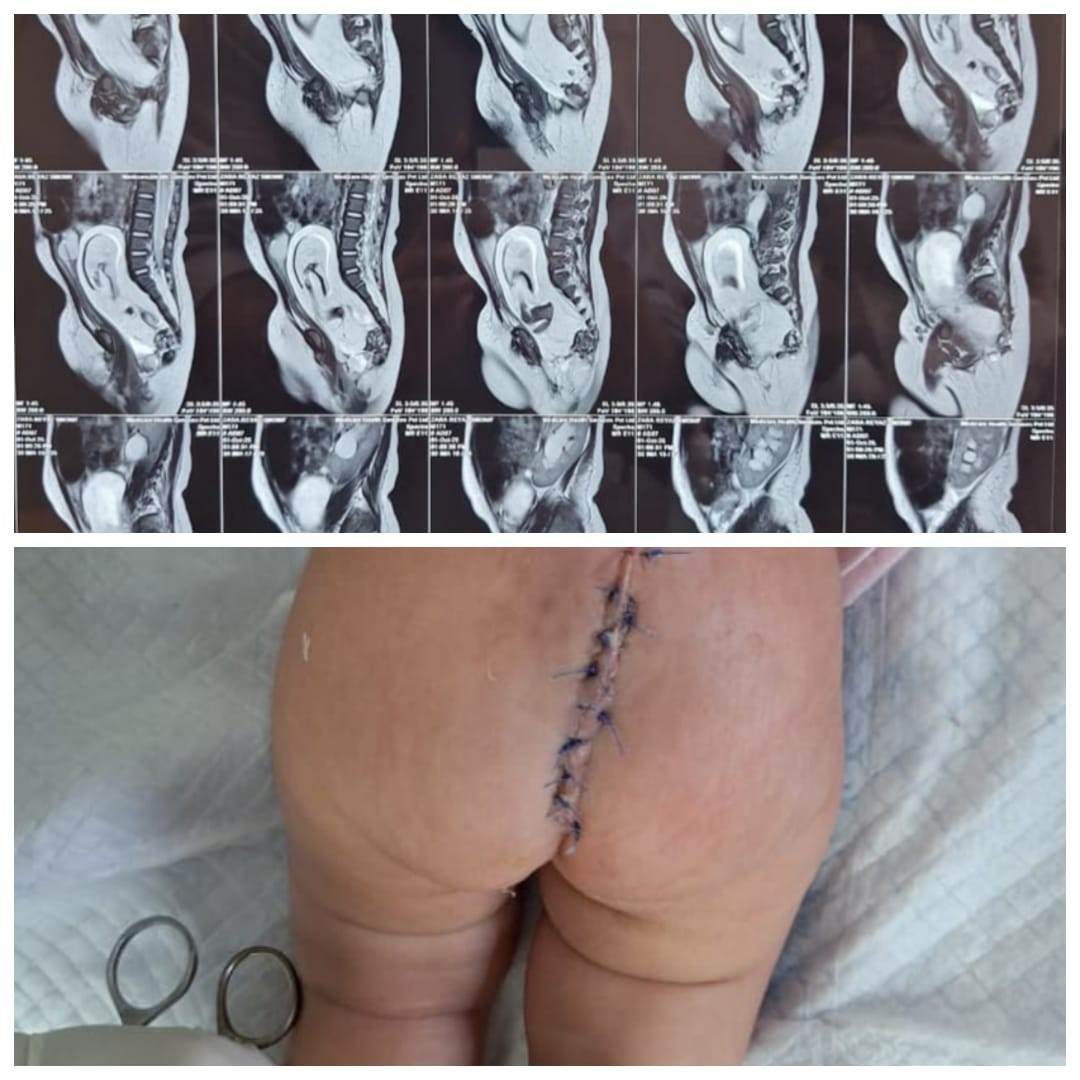
**

1. **Intraoperative and follow-up pictures of a patients operated for sacrococcygeal teratoma (SCT)**

**
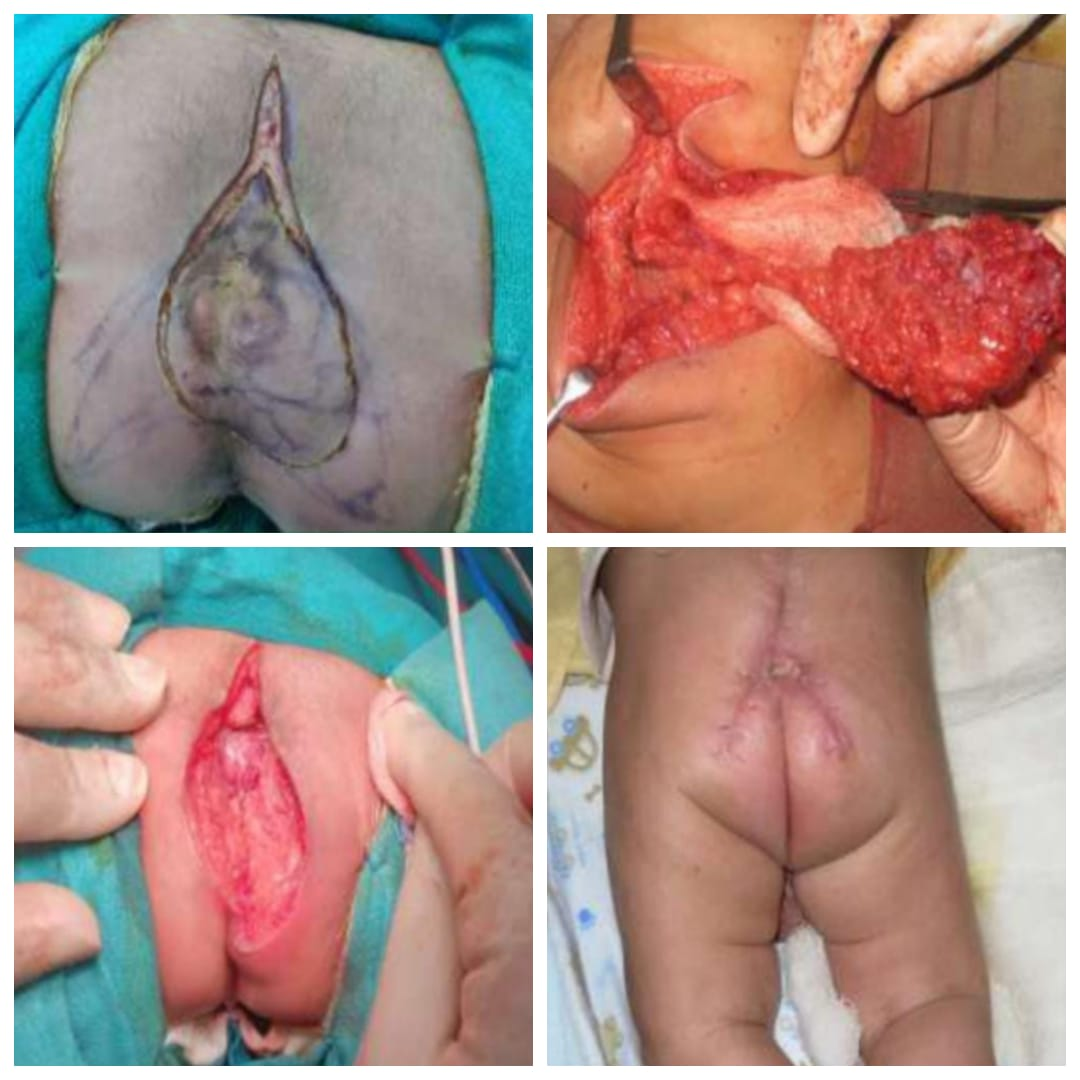
**
